1 **Relaxed risk of predation drives parallel evolution of stickleback behaviour**

2

3 Antoine Fraimout<sup>1,2</sup>, Elisa Päiviö<sup>1</sup> and Juha Merilä<sup>1,2</sup>

4

5 <sup>1</sup>Ecological Genetics Research Unit, Organismal and Evolutionary Biology Research Programme,  
6 Faculty of Biological and Environmental Sciences, FI-00014 University of Helsinki, Finland

7 <sup>2</sup>Area of Ecology and Biodiversity, School of Biological Sciences, The University of Hong Kong,  
8 Hong Kong SAR

9

10 \*Corresponding author: fraimout.antoine@gmail.com

11 **Abstract**

12 The occurrence of similar phenotypes in multiple independent populations (*viz.* parallel evolution) is a  
13 testimony of evolution by natural selection. Parallel evolution implies that populations share a  
14 common phenotypic response to a common selection pressure associated with habitat similarity.  
15 Examples of parallel evolution at the genetic and phenotypic levels are fairly common, but the driving  
16 selective agents often remain elusive. Similarly, the role of phenotypic plasticity in facilitating early  
17 stages of parallel evolution is unclear. We investigated whether the relaxation of predation pressure  
18 associated with the colonization of freshwater ponds by nine-spined sticklebacks (*Pungitius pungitius*)  
19 likely explains the divergence in complex behaviours between marine and pond populations, and  
20 whether this divergence is parallel. Using laboratory-raised individuals exposed to different levels of  
21 perceived predation risk, we calculated vectors of phenotypic divergence for four behavioural traits  
22 between habitats and predation risk treatments. We found a significant correlation between the  
23 directions of evolutionary divergence and phenotypic plasticity, suggesting that habitat divergence in  
24 behaviour is aligned with the response to relaxation of predation pressure. Finally, we show that this  
25 alignment is found across multiple pairs of populations, and that the relaxation of predation pressure  
26 has likely driven parallel evolution of behaviour in this species.

27

28

29

30

31 **Keywords:** Behaviour, predation, parallel evolution, vector analysis, *Pungitius pungitius*, phenotypic  
32 plasticity

### 33 INTRODUCTION

34 Similar environments may impose similar selection pressures on newly colonizing populations,  
35 leading to recurrent phenotypes in multiple habitats (Bailey *et al.* 2015). The evolution of similar  
36 phenotypes between lineages – convergent evolution (Rosenblum *et al.* 2014) – has long been  
37 attributed to natural selection, as only such a deterministic process is expected to result in the  
38 occurrence of the same traits in similar environments (Rundle *et al.* 2000, Schluter *et al.* 2004).  
39 Recent studies of repeated evolution in the wild have greatly advanced our understanding of the  
40 population-specific factors influencing the likelihood of parallel evolution (Stern & Lee 2020, Fang *et*  
41 *al.* 2021, Kingman *et al.* 2021) and the genetic underpinnings of convergent phenotypic adaptation  
42 (Xie *et al.* 2019, Kemppainen *et al.* 2021). Nonetheless, these detailed studies of the genetic  
43 mechanisms involved in the response to selection, often elude identifying the actual selective agents  
44 behind the observed responses. Yet, the main premise of repeated evolution is that the lineages  
45 evolving in parallel should do so in response to a common selection pressure and therefore,  
46 identifying the environmental factors driving these responses is central to our understanding of  
47 parallel evolution.

48

49 Predation is a ubiquitous feature of ecosystems and a driving force of the evolution of species  
50 interactions (Abrams 2000). Because of its direct influence on fitness, predation is also a strong  
51 selective agent behind the evolution of morphological (Eklöv *et al.* 2006), physiological (Rödl *et al.*  
52 2007) and behavioural traits (Lapedra *et al.* 2018) in prey species. While predation can shape the  
53 distribution of phenotypes in prey communities, relaxation of predation pressure – *e.g.*, following the  
54 colonization of a predator-free habitat – has been suggested to favour certain traits and lead to the  
55 evolution of novel phenotypes (Bliard *et al.* 2020). In either case, the presence or absence of predators  
56 in the environment is expected to play a central role in adaptive evolution, and generate long-term  
57 divergence stemming from different levels of predation (Nosil 2004, Nosil & Crespi 2006). Changes  
58 in the predation regime of an environment can also induce short-term individual responses through  
59 phenotypic plasticity (see West-Eberhard 2003 for definition and Benard 2004 for review). For  
60 instance, organisms may adjust their behaviour when predation risk is high to either increase their

61 probability of survival (Wen & Ueno 2021), or the survival of their offspring (Peluc *et al.* 2008).  
62 Consequently, individual variation in the magnitude and direction of plasticity in a population  
63 provides an additional source of phenotypic variation for selection to act on (Abbey-Lee &  
64 Dingemanse 2019), and it has been hypothesized that plasticity can sometimes ‘take the lead’ in early  
65 stages of adaptive evolution (Scoville & Pfrender 2010, Levis & Pfennig, 2016, 2020). Empirical  
66 evidence for the role of phenotypic plasticity in repeated evolution of complex traits is still relatively  
67 scarce, yet its putative part in paving the way of adaptive evolution holds an important place in the  
68 Extended Evolutionary Synthesis (Futuyma 2017).

69

70 Here, we investigated the effects of perceived predation risk on the expression of behavioural traits in  
71 two types of locally adapted populations of the nine-spined stickleback (*Pungitius pungitius*). The  
72 nine-spined stickleback is a teleost fish distributed across the northern parts of Eurasia and North  
73 America. An ecological peculiarity of this species is that it naturally occurs in both marine and  
74 freshwater habitats. Marine ancestral populations of *P. pungitius* have colonized multiple freshwater  
75 habitats following the last glaciation ca. 11,000 years ago (Feng *et al.* 2021) and *P. pungitius* are now  
76 found in isolated ponds throughout Northern Europe (Teacher *et al.* 2011). Whereas marine  
77 populations of *P. pungitius* co-occur with a diverse community of piscine predators, freshwater pond  
78 populations have evolved in a virtually predator-free environment where they are often the sole fish  
79 species (Herczeg *et al.* 2010). As a result, it has been hypothesized that pond populations have  
80 evolved remarkable phenotypes in response to this relaxation of predation pressure, including  
81 gigantism (Herczeg *et al.* 2009a) and bold aggressive behaviours (Herczeg *et al.* 2009b). Empirical  
82 evidence demonstrated that among-habitat differences in behaviour are genetically based and have  
83 resulted from divergent selection acting on several behavioural traits (Karhunen *et al.* 2014). Despite  
84 this evidence, whether predation is the likely factor driving behavioural divergence among habitats,  
85 and whether such divergence has repeatedly occurred in parallel, is yet to be tested experimentally.

86

87 We hypothesized that the relaxation of predation pressure associated with the colonization of  
88 predator-free habitats has driven the evolution of behaviour in pond populations of *P. pungitius*.

89 Furthermore, we test the complementary hypothesis that the between-habitat divergence in behaviour  
90 may have resulted from the expression of advantageous plastic phenotypes in response to the  
91 relaxation of predation pressure. To this end we used an experimental test of behavioural response to  
92 predation exposure in pond and marine nine-spined sticklebacks, and addressed the following  
93 questions: i) Did behaviour evolve in parallel among freshwater *P. punitius* populations? To answer  
94 this question, we verified the expectation that parallel evolution of behaviour should be reflected by  
95 an alignment between the phenotypic vectors of divergence from a marine ancestor, between multiple  
96 pond populations. ii) Is the relaxation of predation pressure likely to be the selective agent underlying  
97 the divergence between marine and pond sticklebacks? For this, we tested the theoretical prediction  
98 (Lind *et al.* 2015, Radersma *et al.* 2020) that the vector of phenotypic plasticity stemming from our  
99 predation exposure treatment should be aligned with the vector of phenotypic divergence between  
100 habitats.

101

## 102 **MATERIALS AND METHODS**

### 103 *Sampling*

104 Adult *P. punitius* were sampled during breeding season (May – June 2018) at eight different  
105 locations in Finland and Sweden corresponding to four coastal marine and four freshwater pond  
106 habitats (Table. S1). Pond populations were sampled using minnow traps placed in ca. 50 cm depth  
107 and marine populations were sampled from shallow (ca. 1m depth) waters using beach-seine nets.  
108 Sampled fish were checked visually to ensure sexual maturity (*i.e.*, black abdomen in males and  
109 rounded bellies in gravid females, *e.g.*, McLennan, 1996) and subsequently transported to the  
110 aquaculture facilities of the University of Helsinki. Wild-caught individuals from each population  
111 were housed separately in 1m<sup>3</sup> plastic aquaria with flow-through water system and fed *ad libitum* with  
112 frozen chironomid larvae twice a day.

113

### 114 *Common garden experiments*

115 In order to control for environmental variance and to measure genetically-based phenotypic variation  
116 among individuals, we set up a common-garden rearing design in the laboratory: for each population,

117 5 to 10 full-sib families were produced ( $n = 65$ ; Table S1) by artificial crossing of random pairs of  
118 wild-caught individuals. We followed the standard *in vitro* fertilization techniques and egg husbandry  
119 protocols for stickleback crossing (Arnott and Barber, 2000) and obtained eggs from gravid females  
120 by gently squeezing their abdomens over a petri dish. Males were over-anesthetized using tricaine  
121 methanesulfonate (MS-222) in order to dissect their testes, which were subsequently minced in the  
122 petri dish containing the eggs. Eggs and sperm were gently mixed using a plastic pipette to ensure  
123 fertilization, and kept in water until hatching. Water in the petri dishes was changed twice a day and  
124 clutches were visually checked for signs of fungal infections or death, and accordingly removed. At  
125 the onset of hatching and for a four weeks period, each clutch was split in two replicate 11 x 10 cm  
126 plastic boxes. Following yolk resorption, fry was fed *ad libitum* with live brine shrimp (*Artemia sp.*  
127 *nauplii*). All replicated families were transferred to Allentown Zebrafish Rack Systems (hereafter  
128 rack; Aquaneering Inc., San Diego, USA). Racks had a closed water circulation system, with multi-  
129 level filtering including physical, chemical, biological and UV filters. All fish were reared in racks  
130 under constant temperature and light conditions (15°C; 12:12 LD) for a period of ca. 1 year (mean  
131 age: 316.4 days) until the start of the behavioural experiment. We ensured that all fish did not show  
132 signs of sexual maturity which could affect the expression of behaviours. Before starting the  
133 experiments, all families were transferred to holding tanks where they were kept in constant  
134 temperature and light conditions (15°C; 12:12 LD) throughout the experimental periods. Replicates of  
135 the same family were housed in separate tanks in order to account for common environment variance.

136

### 137 *Experimental setup*

138 Two identical experimental aquaria with independent flow-through water systems were built for the  
139 experiments (*Supplementary methods*; Fig. S1). Each aquarium was divided transversely in two  
140 sections by a transparent plastic plate separating the behavioural arena and the holding arena. The  
141 behavioural arena corresponded to the half of the tank where the focal fish were placed and scored for  
142 behaviours, while the holding arena corresponded to the half where the predators were introduced  
143 (predation treatment) or left empty (control treatment; see below). In order to investigate the effect of  
144 predation risk on stickleback behaviour, behavioural tests were conducted in the presence and absence

145 of predators. One of the experimental aquaria was assigned to predation treatment and one to control  
146 treatment. In the predation treatment, a pair of wild-caught perch (*Perca fluviatilis*), a natural predator  
147 of marine *P. pungitius* (Nelson & Bonsdorff 1990), were placed on the holding arena of the  
148 experimental aquarium.

149

#### 150 *Behavioural measurements*

151 We measured ecologically relevant behaviours classified into two categories: exploration (an  
152 individual's propensity to explore a novel environment), and risk-taking during foraging (an  
153 individual's tendency to take risks to obtain food). All behavioural measurements were performed  
154 with one fish at a time and fish were starved for 24 hours prior to the experiments. Each trial started  
155 by transferring the focal fish from the holding tank into the behavioural arena of the experimental tank  
156 and running the exploration test followed by the risk-taking test (see also *Supplementary methods* for  
157 details).

158 The focal fish was caught from its holding tank with a hand net and introduced into the cylinder in the  
159 experimental tank (Fig. S1). The fish was left to acclimatise inside the cylinder for three minutes.  
160 After this acclimation time, the door of the cylinder was opened allowing the fish to leave the cylinder  
161 to explore the experimental tank. Two measurements were recorded: the latency until the head of the  
162 fish came out of the cylinder, and the latency until the full body of the fish came out of the cylinder.

163 Following the exploration test, the cylinder was removed, and the fish was left to acclimatize for three  
164 minutes in the behavioural arena. After the acclimation period, chironomid larvae (a familiar food)  
165 were pipetted into the open area of the tank in a straight diagonal line from the edge of the refuge to  
166 the opposite corner of the tank (see Fig. S1). With this kind of food administration, the more the fish  
167 ate, the further it had to move from the refuge, so that the "risk" experienced by the fish (swimming  
168 further into the open area and closer to the predator) was proportional to the "reward" (number of  
169 food items). Three measurements were recorded: the time spent in the open area (whole body outside  
170 the refuge area when viewed from above) in the five minutes following the addition of the first food  
171 item; the latency to initiate feeding after the addition of the first food item; and the total number of  
172 feeding events measured as the number of successful attacks on the food.

173 All time variables (latencies) were measured in seconds and each trial was terminated if the fish did  
174 not express the behaviour after 5 minutes, so that the maximum value for these measurements was  
175 300 seconds. At the end of the experiment, a total of 422 individuals were phenotyped across 65  
176 families and eight populations for the four following traits: emergence time (the arithmetic mean of  
177 time-to-head-out and time-to-body-out variables, see *Supplementary methods*), open time (time spent  
178 in the open area), feeding (the number of feeding bouts) and risk-taking (the latency to first feeding).

179

#### 180 *Statistical tests of phenotypic differentiation*

181 We first investigated behavioural variation between populations, habitats and the effect of perceived  
182 predation using statistical models. Our data consisted of three right-censored (*i.e.*, truncated) time-to-  
183 event variables. This type of data is not suitable for classical linear regression approaches (*i.e.*, linear  
184 mixed- or generalized linear models; Edelaar *et al.* 2012) and we thus followed multiple statistical  
185 frameworks to verify the robustness of our results (see *Data analysis of right-censored data* in  
186 *Supplementary methods*). We here present the main analysis applied to these variables. For the right-  
187 censored time-to-event variables (*i.e.*, emergence time, open time, risk-taking), we fitted censored  
188 regressions using the *censReg* R package (v.0.5-32, Henningsen 2017). Main fixed effects of interest  
189 included habitat of origin and treatment (predation or control) and their interaction, and setting the  
190 right limit for censoring at 300 (the maximum time value in seconds in our experiment).

191 Count data (*i.e.*, feeding variable) were analysed with a generalized linear model (GLM) using the  
192 *glm* function in the *lme4* R package (v.1.1-27, Bates *et al.* 2015) with habitat of origin and treatment  
193 and their interaction as fixed effects. To account for the possible effects of body size and age variation  
194 in our data, we fitted all the above models including an age-corrected body size covariate, computed  
195 from the residuals of a linear regression of body size on age. Temporal block of measurements (see  
196 *Supplementary methods*) was set as fixed effect in all models.

197

#### 198 *Phenotypic vector analysis*

199 We investigated parallelism in behavioural evolution by computing two types of phenotypic vectors:  
200 first, we estimated the evolutionary divergence vectors ( $\Delta z_D$ ) corresponding to the phenotypic

201 differences between marine and freshwater habitats. Specifically, we calculated the vectors of  
202 phenotypic change between each pond population from a hypothetical marine ancestral population.  
203 The ancestral marine population was estimated as the average behavioural phenotype from all the  
204 marine individuals measured in the presence of predators. We used these measurements as  
205 representative of a natural marine population experiencing predation pressure. Following the same  
206 logic, pond populations in the control treatment (no predation) were used as representative of natural  
207 freshwater populations experiencing no piscine predation. Vectors were calculated as the phenotypic  
208 difference between each pond population and the hypothetical ancestral population such that:

$$209 \quad \Delta z_D = \underline{z}_P - \underline{z}_A \quad (1)$$

210 where  $\underline{z}_P$  corresponds to the mean phenotype of a pond population and  $\underline{z}_A$  to the mean phenotype in  
211 the ancestral marine population. Mean population phenotypes were extracted from separate model  
212 coefficients (censored regression or GLM, see above) using each behaviour trait as response variable  
213 and population of origin, treatment and their interaction as fixed effects. Age-corrected body sizes  
214 were used as covariates in all models as described above.

215 Second, we estimated the vectors of phenotypic plasticity (hereafter, plasticity vectors,  $\Delta z_\varphi$ ) as the  
216 phenotypic change induced by predation exposure. We were primarily interested in the plasticity  
217 vectors depicting the behavioural changes following the relaxation of predation pressure and thus,  
218 equivalent to the colonization of predator-free freshwater habitats by historical marine *P. pungitius*  
219 populations. To this end, we calculated the plasticity vectors as the phenotypic changes between the  
220 hypothetical ancestral population and each marine population measured in the control treatment as:

$$221 \quad \Delta z_\varphi = \underline{z}_M - \underline{z}_A \quad (2)$$

222 where  $\underline{z}_M$  is the mean trait value for the marine population measured in the absence of predators and  
223  $\underline{z}_A$ , is the same as in eq. (1).

224 In order to test for the alignment between all pairs of divergence and plasticity vectors, we estimated  
225 the angle  $\theta$  between any two pairs of vectors as:

$$226 \quad \theta = \cos^{-1}(\Delta z_{Ai1} \Delta z_{Ai2}^T) \quad (3)$$

227 where each vector  $\Delta z$  corresponds to the normalized phenotypic vector of difference between the focal



228 population  $i$  and the estimated marine ancestor  $A$ . Angles were calculated in degrees between all  
229 pairwise combinations of divergence and plasticity vectors. We assessed the statistical significance of  
230 all observed angles by comparing them to the angles calculated from 10,000 random vectors drawn  
231 from a normal distribution. Because we were interested in evaluating the evolution of complex  
232 behaviour in *P. pungitius*, each phenotypic vector described above was constructed from the  
233 multivariate behavioural traits' dataset in each population and treatment. In other words, each vector  
234 of divergence or plasticity included the differences in means for all four behaviour traits measured,  
235 thus providing a multivariate measure of differentiation. In order to avoid scaling issues due to the  
236 differences between count data (*i.e.*, feeding behaviour) and time-to-event data, raw measurements  
237 were transformed to z-scores using the *scale* function in R (v.4.1.1, R core team, 2021) prior to all  
238 phenotypic vector analyses.

239 We then followed the methodology of De Lisle & Bolnick (2021) to identify the dimensions of  
240 parallel change among divergence and plasticity vectors by analysing  $\mathbf{C}$ , the matrix of correlation  
241 between replicated pairs of phenotypic vectors. We started this by constructing the matrix  $\mathbf{X}$ , an  $m \times n$   
242 matrix with  $m$  rows containing each pairwise divergence and/or plasticity vector (*i.e.* each  $\Delta z_\varphi$  and  
243  $\Delta z_D$ ) and  $n$  columns containing each behavioural trait (in our case  $8 \times 4$ ).  $\mathbf{C}$  was calculated as:

$$244 \quad \mathbf{C} = \mathbf{X}\mathbf{X}^T \quad (4)$$

245 Eigenanalysis of  $\mathbf{C}$  further allowed us to estimate whether one or more direction in the multivariate  
246 space (the eigenvectors) underlined a common parallel direction among our study populations, as well  
247 as the extent to which certain populations showed more parallelism among each other (see *Results*  
248 section) than others. All analyses were performed in R v.4.1.1 (R core team, 2021).

249

## 250 **RESULTS**

### 251 *Phenotypic differentiation*

252 There was a strong habitat differentiation in all behaviour variables and pond sticklebacks were  
253 consistently more explorative and took more risks during foraging than marine sticklebacks (Fig. 1A-  
254 D; Fig S2; Table S2). Overall, the predation treatment had stronger effects on foraging behaviours

255 than exploration behaviour (Fig 1; Table S2-S4). Both pond and marine fish reduced the amount of  
256 feeding (Fig.1, Table S2) and took longer time to initiate feeding in the presence of predators (Fig. 1,  
257 Table S2-S4). Emergence time was not significantly affected by the presence of predators (Fig 1.  
258 Table S2-S4) but the predation treatment accentuated the habitat difference for this trait, with pond  
259 fish showing quicker emergence from refuge in the predation treatment (Fig. 1, Table S4). We found  
260 that our results were robust across different statistical methods (Table S2-S4) with the exception of  
261 open time: marine individuals were less likely to spend time in the open area in the presence of  
262 predators whereas the predation treatment did not lead to a significant decrease in open time in pond  
263 fish (Fig. 1, Table S2-3) but this result was not reflected by differences in survival curves using the  
264 Kaplan-Meier framework (Fig. S2, Table S4). We found limited statistical support for a significant  
265 interaction between the treatment and habitat effects in our models (only for open time using Box-Cox  
266 transformed data, Table S3), suggesting that both pond and marine fish had a similar plastic response  
267 to the exposure to predators. Finally, age-corrected body size only had a significant effect on the risk-  
268 taking behaviour with larger fish showing increased latency to first feeding (Table S2-S3).

269

#### 270 *Phenotypic vector analyses*

271 Our phenotypic vector analyses allowed us to investigate three aspects of the evolution of complex  
272 behaviour in *P. pungitius* (Fig. 2, Table 1): i) the degree of parallelism between vectors of freshwater  
273 adaptation, indicated by the among-ponds comparisons of vectors (Table 1, green cells); ii) the degree  
274 of parallelism between the vectors of phenotypic plasticity, indicated by the among-marine  
275 comparisons of vectors (Table 1, blue cells) and iii) the correlation between the vectors of plasticity  
276 and evolutionary divergence, indicative of the effect of predation relaxation on the evolution of  
277 behaviour from marine to pond habitats (Table 1, red cells). We found that three out of the four pond  
278 populations shared a parallel direction of phenotypic divergence from the ancestral marine population,  
279 as evidenced by the small angles between their divergence vectors, which were found to be more  
280 similar than between random vectors (Table 1). The FIN-KRK population consistently showed  
281 evidence for non-parallelism with the other pond populations (Table 1, Fig. 1). We found that the  
282 plastic response to the relaxation of predation pressure was largely shared among marine populations.

283 Only one pair of populations (FIN-POR and FIN-RAA, Table 1) did not show evidence of parallelism  
284 between the vectors of phenotypic plasticity and another pair (FIN-RAA and SWE-UME, Table 1)  
285 had a small but marginally non-significant angle between vectors. Out of the 16 pairs of plasticity-  
286 divergence vectors, 10 showed significant parallelism, as indicated by the low angles between each  
287 pair of vectors (Table 1). The six non-significant parallel pairs of vectors all included the FIN-KRK  
288 and FIN-POR populations, indicating that the divergence of the FIN-KRK population from the marine  
289 ancestor did not follow the global direction of phenotypic plasticity and, conversely, that the plastic  
290 response of the FIN-POR population, did not align with the divergence vectors of all pond  
291 populations (Table 1). Overall, alignments between divergence and plasticity vectors indicate that the  
292 direction of behavioural change in the multivariate trait space induced by the relaxation of predation is  
293 similar to the direction of change observed in nature between marine and pond habitats.  
294 Finally, we found that the directions of phenotypic changes stemming from the between-habitat  
295 divergence and the experimental relaxation of predation treatment were underlined by a single  
296 orthogonal dimension or parallelism, as evidenced by the first dimension of the **C** matrix  
297 decomposition (Fig. 2) showing greater eigenvalue than expected at random.

298

## 299 **DISCUSSION**

300 Our common garden experiment shows that genetically-based differences in behaviour among pond  
301 and marine populations of *P. pungitius* have repeatedly evolved in parallel from marine ancestors. We  
302 found that our predation treatment generated a strong plastic response in most behavioural traits in  
303 both habitats and that this plastic response was aligned with the direction of evolutionary divergence.  
304 Below we discuss the implications of our results for the study of behavioural evolution in the wild.

305

306 The analyses of phenotypic vectors were based on a hypothetical marine ancestral population,  
307 corresponding to the average behavioural phenotype of contemporary Baltic Sea populations of *P.*  
308 *pungitius*. The detailed phylogeographic history of the nine-spined sticklebacks in Fennoscandia was  
309 recently resolved (Feng *et al.* 2021) and suggests that the Finnish pond and northernmost Baltic  
310 marine populations used in the current study most likely originated from ancestral populations in the

311 White Sea rather than from the Baltic Sea (Teacher *et al.* 2011, Bruneaux *et al.* 2013, Feng *et al.*  
312 2021). Nonetheless, Baltic *P. pungitius* are expected to be phenotypically similar (particularly  
313 regarding behaviour) to contemporary populations found in the White Sea (Herczeg *et al.* 2009a,  
314 Karhunen *et al.* 2014). More importantly, statistical modelling of behavioural phenotypes in relation  
315 to genetic coancestry revealed that the behaviour of contemporary marine populations of *P. pungitius*  
316 (Baltic and White Sea) is akin to the expected ancestral marine behaviour (see Fig. 3C, D in Karhunen  
317 *et al.* 2014). Our reconstruction of the ancestral population in the current analyses should thus be  
318 valid.

319

320 Pairwise comparisons of phenotypic vectors showed that the divergence of one freshwater population  
321 (FIN-KRK) deviated from that of other pond populations. Although we did not record the presence of  
322 other fish species at the time of sampling at this location, artificial introduction of potentially  
323 predatory trout (*Salmo trutta*) has been reported in this pond (Herczeg *et al.* 2010), and could explain  
324 the observed divergence in behaviour of this population. We also note that this population had the  
325 lowest sample size of our study and that estimates may be biased. Nevertheless, our multivariate test  
326 of parallelism identified a shared direction of phenotypic divergence among all pond populations,  
327 providing good evidence for the parallel evolution of behaviour associated with the colonization of  
328 freshwater habitat in this species. Moreover, this shared direction of parallelism also indicated that the  
329 direction of phenotypic plasticity generated by our control treatment (relaxation of predation pressure)  
330 is aligned with the direction of evolutionary divergence among habitats.

331

332 As for any other trait, evolution of phenotypic plasticity would require that the plastic response is  
333 genetically based and variable between individuals, and that this response would be advantageous in  
334 the environment where it is expressed (Ghalambor *et al.* 2007). Here, we used a common garden  
335 design to ensure the measurement of genetically based differences between individuals and focused  
336 on traits known to be heritable in sticklebacks (Bell 2005, Dingemanse *et al.* 2012, Karhunen *et al.*  
337 2014). Predation elicited behaviours that could be considered to be advantageous in their  
338 corresponding environments and, particularly in the marine (ancestral) individuals. Indeed, in the

339 presence of predators, fish would reduce activity time and foraging rates (thus decreasing their  
340 probability of mortality) while they increased these behaviours, and consequently their resource  
341 intake, in the absence of predators. Selection acting on this new advantageous variation in predator-  
342 free habitat would thus promote the evolution of bold behaviours. Nonetheless, Futuyma (2017)  
343 argued that “*phenotypic plasticity could be said to truly play a leading role (with genes as followers)*  
344 *if an advantageous phenotype were to be triggered by an environment that really is novel for the*  
345 *species lineage*”. In the case of *P. pungitius* – and more generally, in the case of predation – it is  
346 difficult to argue that the absence of predators is a truly novel condition to marine ancestors of  
347 freshwater adapted populations. Instead, the selection pressure imposed by predation in the wild could  
348 be viewed as a parameter with fluctuating intensity rather than a discrete state of the marine habitat  
349 (Moore *et al.* 2021). As such, varying levels of predation may have shaped the distribution of  
350 behaviours in ancestral populations of *P. pungitius* through balancing selection, and generated  
351 standing variation promoting local adaptation to freshwater habitats even through plastic responses.  
352 Although our results may not provide direct evidence for the role of plasticity in leading adaptive  
353 evolution, our study opens an interesting avenue of research to investigate the fitness effects of  
354 predation pressure in *P. pungitius*, and more generally, to consider the role of predation-induced  
355 plasticity in the evolution of complex traits.

356

357 There were marked behavioural differences between marine and pond sticklebacks and our findings  
358 are in agreement with those found in earlier studies (Herczeg *et al.* 2009a; Herczeg & Välimäki,  
359 2011). However, in contrast to earlier studies (*e.g.*, Herczeg *et al.* 2009a; Herczeg & Välimäki, 2011;  
360 Laine *et al.*, 2014), all fish in our study were reared in groups. Since nine-spined sticklebacks display  
361 social behaviour such as schooling (Herczeg *et al.* 2009c), it is possible that the behaviours measured  
362 in our study were affected by this social component. Nonetheless, such social effects in the behaviours  
363 along the shy-bold continuum have been shown to exacerbate pre-existing differences in another fish  
364 species and was only found to affect shy individuals (*i.e.*, shy individuals are shyer in the presence of  
365 shy conspecifics, Frost *et al.* 2007). Therefore, it is possible that shy behaviour (low exploration and  
366 risk-taking) was enforced in shy groups also in our study. This, however, might only accentuate

367 existing behavioural differences, and would not have an effect on our conclusions. This is especially  
368 the case since the bold behaviour of the pond populations would have been relatively unaffected by  
369 group rearing. Overall, our large replicated common garden design provides robust evidence for the  
370 genetic basis of behavioural variation in wild stickleback populations from the two contrasting  
371 habitats.

372

373 Another important aspect of sociality in the expression of behaviours in *P. pungitius* is intraspecific  
374 competition. Indeed, the colonization of predator-free and low-productivity pond habitat is also  
375 associated with high levels of intraspecific competition and the evolution of gigantism and bold  
376 behaviours in the ponds has also been hypothesized to stem from this increased competition (Herczeg  
377 *et al.* 2009a,b). In such environments, the relaxation of predation pressure and absence of other  
378 species sharing similar trophic niche has inevitably led to the need for conspecifics to compete for  
379 limited food resources. Hence, it is possible that predation alone would not be sufficient to explain the  
380 evolution of bold behaviours and our current experimental setup does not allow to disentangle the  
381 effects of predation from the effects of intraspecific competition. However, an important result of our  
382 study is that the relaxation of predation pressure directly enhanced the foraging rate – a particularly  
383 important life-history trait – in all populations. Therefore, our results suggest that the relaxation of  
384 predation pressure would have allowed ‘quick and heavy’ feeders to acquire more resources in  
385 predator-free environments, which in turn, would be favoured by the new selection pressure imposed  
386 by the pond habitats. Future studies specifically testing for the interaction between predation risks and  
387 interspecific competition (*e.g.*, Urban *et al.* 2015) are needed to shed more light on this specific aspect  
388 of behavioural evolution in *P. pungitius*.

389

390 In conclusion, we have demonstrated that genetically based differences in complex behaviour in  
391 Fennoscandian nine-spined sticklebacks have repeatedly evolved in similar environments and most  
392 likely in response to the same selection pressure. This provides strong evidence that this complex trait  
393 has evolved by natural selection in this species (*cf.* Schluter 2004). We also demonstrated that the  
394 phenotypically plastic response to the relaxation of predation pressure is aligned with the direction of

395 evolutionary divergence observed in the wild, suggesting that phenotypic plasticity has likely  
396 contributed to the early stages of evolution of behaviour in freshwater habitats. Overall, our study  
397 shows that genetically determined behaviours can evolve through natural selection, and that  
398 behavioural traits are well suited to studying local adaptation in general.

399

#### 400 **ETHICAL STATEMENT**

401 All experiments were conducted under a permit from the Animal Experiment Board in Finland  
402 (permit reference ESAVI/4979/2018).

403

#### 404 **AUTHOR CONTRIBUTION**

405 AF and JM conceived the study; AF and EP conceived the experimental setup; EP performed all  
406 behavioural measurements; AF and EP analysed the data; AF led the writing of the manuscript with  
407 contributions from EP and JM; JM funded the study.

408

#### 409 **DATA AVAILABILITY**

410 Raw data will be deposited to Dryad upon acceptance. R code to reproduce the analyses will be made  
411 available at <https://github.com/afraimout/>.

412

#### 413 **ACKNOWLEDGEMENTS**

414 Thanks are due to Jacquelin DeFaveri, Niko Björkell, Karlina Ozolina, Niina Nurmi, and Miinastiina  
415 Issakainen for their precious help in sampling and rearing sticklebacks. We thank Xue-Yun Feng for  
416 his help in sampling perches and Nicolas Navarro for helpful comments on the phenotypic vector  
417 analysis. Our research was funded by the Academy of Finland (grant # 218343 to JM). The authors  
418 have no conflict of interest to declare.

419

#### 420 **REFERENCES**

421 Abbey-Lee, R. N., & Dingemanse, N. J. (2019). Adaptive individual variation in phenological  
422 responses to perceived predation levels. *Nature Communications*, 10(1), 1-8.  
423 Abrams, P. A. (2000). The evolution of predator-prey interactions: theory and evidence. *Annual*  
424 *Review of Ecology and Systematics*, 31(1), 79-105.



- 425 Arnott, S., & Barber, I. (2000). Split-clutch IVF: a technique to examine indirect fitness consequences  
426 of mate preferences in sticklebacks. *Behaviour*, 137(7-8), 1129-1140.
- 427 Bailey, Susan F., Nicolas Rodrigue, and Rees Kassen. (2015) The effect of selection environment on  
428 the probability of parallel evolution. *Molecular biology and evolution* 32(6) 1436-1448.
- 429 Bates D, Mächler M, Bolker B, Walker S (2015). Fitting Linear Mixed-Effects Models Using lme4.”  
430 *Journal of Statistical Software*, 67(1), 1–48.
- 431 Bell, A. M. (2005). Behavioural differences between individuals and two populations of stickleback  
432 (*Gasterosteus aculeatus*). *Journal of Evolutionary Biology*, 18(2), 464-473.
- 433 Benard, M. F. (2004). Predator-induced phenotypic plasticity in organisms with complex life  
434 histories. *Annu. Rev. Ecol. Evol. Syst.*, 35, 651-673.
- 435 Bliard, L., Paquet, M., Robert, A., Dufour, P., Renoult, J. P., Grégoire, A., ... & Doutrelant, C. (2020).  
436 Examining the link between relaxed predation and bird coloration on islands. *Biology Letters*, 16(4).
- 437 Bruneaux, M., Johnston, S. E., Herczeg, G., Merilä, J., Primmer, C. R., & Vasemägi, A. (2013).  
438 Molecular evolutionary and population genomic analysis of the nine-spined stickleback using a  
439 modified restriction-site-associated DNA tag approach. *Molecular Ecology*, 22(3), 565-582.
- 440 De Lisle, S. P., & Bolnick, D. I. (2020). A multivariate view of parallel evolution. *Evolution*, 74(7),  
441 1466-1481.
- 442 Dingemans, N. J., Barber, I., Wright, J., & Brommer, J. E. (2012). Quantitative genetics of  
443 behavioural reaction norms: genetic correlations between personality and behavioural plasticity vary  
444 across stickleback populations. *Journal of Evolutionary Biology*, 25(3), 485-496.
- 445 Edelaar, P., Serrano, D., Carrete, M., Blas, J., Potti, J., & Tella, J. L. (2012). Tonic immobility is a  
446 measure of boldness toward predators: an application of Bayesian structural equation modeling.  
447 *Behavioral Ecology*, 23(3), 619-626.
- 448 Eklöv, P., & Svanbäck, R. (2006). Predation risk influences adaptive morphological variation in fish  
449 populations. *The American Naturalist*, 167(3), 440-452.
- 450 Fang, B., Kempainen, P., Momigliano, P., & Merilä, J. (2021). Population structure limits parallel  
451 evolution in sticklebacks. *Molecular Biology and Evolution*, 38(10), 4205-4221.
- 452 Feng, X., Merilä, J., & Löytynoja, A. (2021). Detailed phylogeographic analysis of sticklebacks  
453 exposes challenges in genetic studies of admixed populations. *bioRxiv*.
- 454 Frost, A. J., Winrow-Giffen, A., Ashley, P. J., & Sneddon, L. U. (2007). Plasticity in animal  
455 personality traits: does prior experience alter the degree of boldness?. *Proceedings of the Royal  
456 Society B: Biological Sciences*, 274(1608), 333-339.
- 457 Futuyma, D. J. (2017). Evolutionary biology today and the call for an extended synthesis. *Interface  
458 Focus*, 7(5), 20160145.
- 459 Ghalambor, C. K., McKay, J. K., Carroll, S. P., & Reznick, D. N. (2007). Adaptive versus  
460 non-adaptive phenotypic plasticity and the potential for contemporary adaptation in new  
461 environments. *Functional Ecology*, 21(3), 394-407.
- 462 Henningsen, A. (2017). *censReg: Censored Regression (Tobit) Models*. R package version 0.5.  
463 <http://CRAN.R-Project.org/package=censReg>
- 464 Herczeg, G., Gonda, A., & Merilä, J. (2009a). Predation mediated population divergence in complex  
465 behaviour of nine-spined stickleback (*Pungitius pungitius*). *Journal of Evolutionary Biology*, 22(3),  
466 544-552.
- 467 Herczeg, G., Gonda, A., & Merilä, J. (2009b). Evolution of gigantism in nine-spined sticklebacks.  
468 *Evolution*, 63(12), 3190-3200.
- 469 Herczeg, G., Turtainen, M., & Merilä, J. (2010). Morphological divergence of North-European nine-  
470 spined sticklebacks (*Pungitius pungitius*): signatures of parallel evolution. *Biological Journal of the  
471 Linnean Society*, 101(2), 403-416.
- 472 Karhunen, M., Ovaskainen, O., Herczeg, G., & Merilä, J. (2014). Bringing habitat information into  
473 statistical tests of local adaptation in quantitative traits: A case study of nine-spined sticklebacks.  
474 *Evolution*, 68(2), 559-568.
- 475 Herczeg, G., Gonda, A., & Merilä, J. (2009c). The social cost of shoaling covaries with predation risk  
476 in nine-spined stickleback, *Pungitius pungitius*, populations. *Animal Behaviour*, 77(3), 575-580.
- 477 Herczeg, G., & Välimäki, K. (2011). Intraspecific variation in behaviour: effects of evolutionary  
478 history, ontogenetic experience and sex. *Journal of Evolutionary Biology*, 24(11), 2434-2444.



- 479 Kempainen, P., Li, Z., Rastas, P., Löytynoja, A., Fang, B., Yang, J., ... & Merilä, J. (2021). Genetic  
480 population structure constraints local adaptation in sticklebacks. *Molecular Ecology*, *30*(9), 1946-  
481 1961.
- 482 Kingman, G. A. R., Vyas, D. N., Jones, F. C., Brady, S. D., Chen, H. I., Reid, K., ... & Veeramah, K.  
483 R. (2021). Predicting future from past: The genomic basis of recurrent and rapid stickleback  
484 evolution. *Science Advances*, *7*(25), eabg5285.
- 485 Laine, V. N., Herczeg, G., Shikano, T., Vilkki, J., & Merilä, J. (2014). QTL analysis of behavior in  
486 nine-spined sticklebacks (*Pungitius pungitius*). *Behavior Genetics*, *44*(1), 77-88.
- 487 Lapiedra, O., Schoener, T. W., Leal, M., Losos, J. B., & Kolbe, J. J. (2018). Predator-driven natural  
488 selection on risk-taking behavior in anole lizards. *Science*, *360*(6392), 1017-1020.
- 489 Levis, N. A., & Pfennig, D. W. (2016). Evaluating 'plasticity-first' evolution in nature: key criteria  
490 and empirical approaches. *Trends in Ecology & Evolution*, *31*(7), 563-574.
- 491 Levis, N. A., & Pfennig, D. W. (2020). Plasticity-led evolution: A survey of developmental  
492 mechanisms and empirical tests. *Evolution & Development*, *22*(1-2), 71-87.
- 493 Lind, M. I., Yarleth, K., Reger, J., Carter, M. J., & Beckerman, A. P. (2015). The alignment between  
494 phenotypic plasticity, the major axis of genetic variation and the response to selection. *Proceedings of  
495 the Royal Society B: Biological Sciences*, *282*(1816), 20151651.
- 496 McLennan, D. A. (1996). Integrating phylogenetic and experimental analyses: the evolution of male  
497 and female nuptial coloration in the stickleback fishes (Gasterosteidae).
- 498 Moore, M. E., Berejikian, B. A., Greene, C. M., & Munsch, S. (2021). Environmental fluctuation and  
499 shifting predation pressure contribute to substantial variation in early marine survival of steelhead.  
500 *Marine Ecology Progress Series*, *662*, 139-156.
- 501 Nelson, W. G., & Bonsdorff, E. (1990). Fish predation and habitat complexity: are complexity  
502 thresholds real?. *Journal of Experimental Marine Biology and Ecology*, *141*(2-3), 183-194.
- 503 Nosil, P. (2004). Reproductive isolation caused by visual predation on migrants between divergent  
504 environments. *Proceedings of the Royal Society of London. Series B: Biological Sciences*, *271*(1547),  
505 1521-1528.
- 506 Nosil, P., & Crespi, B. J. (2006). Experimental evidence that predation promotes divergence in  
507 adaptive radiation. *Proceedings of the National Academy of Sciences*, *103*(24), 9090-9095.
- 508 Peluc, S. I., Sillett, T. S., Rotenberry, J. T., & Ghalambor, C. K. (2008). Adaptive phenotypic  
509 plasticity in an island songbird exposed to a novel predation risk. *Behavioral Ecology*, *19*(4), 830-835.
- 510 R. Core Team (2021). R: A Language and Environment for Statistical Computing. R Foundation for  
511 Statistical Computing, 2021.
- 512 Radersma, R., Noble, D. W., & Uller, T. (2020). Plasticity leaves a phenotypic signature during local  
513 adaptation. *Evolution Letters*, *4*(4), 360-370.
- 514 Rödl, T., Berger, S., Michael Romero, L., & Wikelski, M. (2007). Tameness and stress physiology in  
515 a predator-naïve island species confronted with novel predation threat. *Proceedings of the Royal  
516 Society B: Biological Sciences*, *274*(1609), 577-582.
- 517 Rosenblum, E.B., Parent, C.E. and Brandt, E.E., 2014. The molecular basis of phenotypic  
518 convergence. *Annual Review of Ecology, Evolution, and Systematics*, *45*, pp.203-226.
- 519 Rundle, H. D., Nagel, L., Boughman, J. W., & Schluter, D. (2000). Natural selection and parallel  
520 speciation in sympatric sticklebacks. *Science*, *287*(5451), 306-308.
- 521 Schluter, D., Clifford, E. A., Nemethy, M., & McKinnon, J. S. (2004). Parallel evolution and  
522 inheritance of quantitative traits. *The American Naturalist*, *163*(6), 809-822.
- 523 Scoville, A. G., & Pfrender, M. E. (2010). Phenotypic plasticity facilitates recurrent rapid adaptation  
524 to introduced predators. *Proceedings of the National Academy of Sciences*, *107*(9), 4260-4263.
- 525 Stern, D. B., & Lee, C. E. (2020). Evolutionary origins of genomic adaptations in an invasive  
526 copepod. *Nature Ecology & Evolution*, *4*(8), 1084-1094.
- 527 Teacher, A. G., Shikano, T., Karjalainen, M. E., & Merilä, J. (2011). Phylogeography and genetic  
528 structuring of European nine-spined sticklebacks (*Pungitius pungitius*)—mitochondrial DNA  
529 evidence. *PLoS One*, *6*(5), e19476.
- 530 Urban, M. C., & Richardson, J. L. (2015). The evolution of foraging rate across local and geographic  
531 gradients in predation risk and competition. *The American Naturalist*, *186*(1), E16-E32.
- 532 Wen, J., & Ueno, T. (2021). Predator cue-induced plasticity of morphology and behavior in  
533 planthoppers facilitate the survival from predation. *Scientific reports*, *11*(1), 1-11.

534 West-Eberhard, M. J. (2003). *Developmental Plasticity and Evolution*. Oxford University Press.  
535 Xie, K. T., Wang, G., Thompson, A. C., Wucherpennig, J. I., Reimchen, T. E., MacColl, A. D., ... &  
536 Kingsley, D. M. (2019). DNA fragility in the parallel evolution of pelvic reduction in stickleback fish.  
537 *Science*, 363(6422), 81-84.

538

539

540 **FIGURES AND TABLES**

541 **Table 1. Angles between phenotypic vectors.** The angle in degrees (above diagonal) between each  
 542 pairwise vector comparison is shown along with their corresponding *p-values* (below diagonal) testing  
 543 for significant differences between observed and random vectors (see *Methods*). Colour shading  
 544 indicates the pairwise comparisons related to the test of parallel evolution among ponds (green),  
 545 parallel phenotypic plasticity (blue) and the alignment between plasticity and divergence vectors (red,  
 546 and see *Methods* for rationale). Bold values indicate statistical significance ( $p < 0.05$ ) and italic values  
 547 non-significance.  
 548

|         | FIN-PYO          | FIN-RYT      | FIN-KRK       | SWE-BYN       | FIN-TVA       | FIN-POR       | FIN-RAA       | SWE-UME       |
|---------|------------------|--------------|---------------|---------------|---------------|---------------|---------------|---------------|
| FIN-PYO |                  | <b>7.144</b> | <i>77.850</i> | <b>15.310</b> | <b>23.694</b> | <i>35.151</i> | <b>9.694</b>  | <b>23.438</b> |
| FIN-RYT | <b>&lt;0.001</b> |              | <i>71.676</i> | <b>11.130</b> | <b>20.409</b> | <i>30.321</i> | <b>15.382</b> | <b>17.105</b> |
| FIN-KRK | <i>0.734</i>     | <i>0.608</i> |               | <i>63.316</i> | <i>56.894</i> | <i>44.654</i> | <i>80.025</i> | <i>56.137</i> |
| SWE-BYN | <b>0.008</b>     | <b>0.003</b> | <i>0.456</i>  |               | <b>11.655</b> | <b>22.085</b> | <b>18.414</b> | <b>11.006</b> |
| FIN-TVA | <b>0.029</b>     | <b>0.020</b> | <i>0.345</i>  | <b>0.004</b>  |               | <b>13.021</b> | <b>23.304</b> | <b>17.207</b> |
| FIN-POR | <i>0.093</i>     | <i>0.059</i> | <i>0.178</i>  | <b>0.021</b>  | <b>0.005</b>  |               | <i>36.020</i> | <b>21.079</b> |
| FIN-RAA | <b>0.003</b>     | <b>0.010</b> | <i>0.781</i>  | <b>0.015</b>  | <b>0.029</b>  | <i>0.101</i>  |               | <i>28.883</i> |
| SWE-UME | <b>0.030</b>     | <b>0.011</b> | <i>0.331</i>  | <b>0.003</b>  | <b>0.012</b>  | <b>0.022</b>  | <i>0.053</i>  |               |

549

550

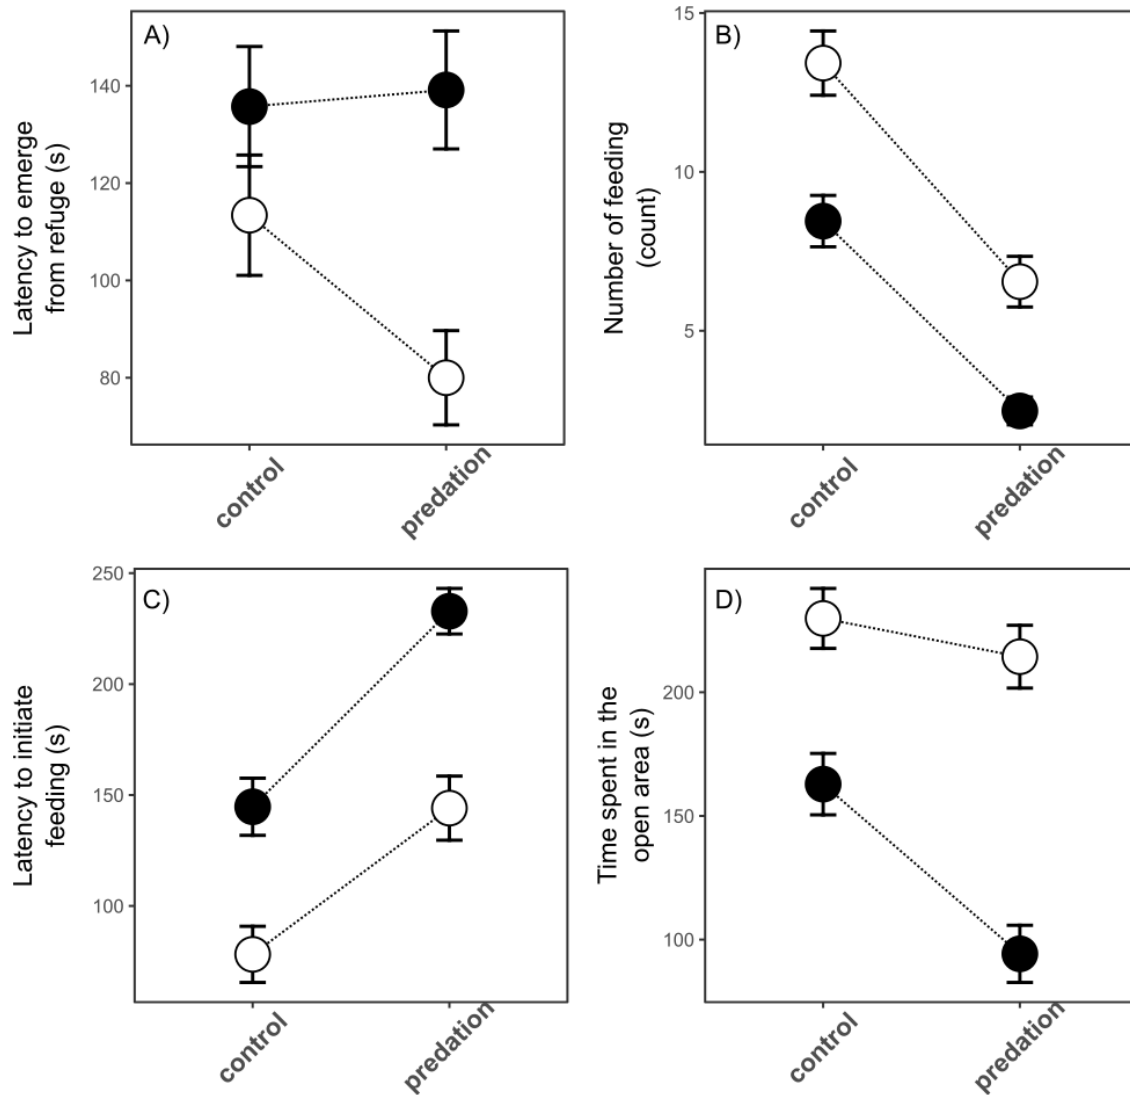

551

552 **Figure 1. Behavioural variation between habitats and treatments.** Mean values (circles) and  
553 standard errors (whiskered vertical bars) for the raw behaviour measurements are shown for marine  
554 (filled circles) and pond (open circles) fish in the control and predation treatments. A: Emergence  
555 time, the latency to emerge from a refuge (in seconds); B: Feeding, the number of feeding event  
556 (count); C: Risk-taking, the latency to initiate feeding (in seconds); D: Open time, the time spent in  
557 the open area (in seconds). Dashed lines represent the reaction norms for each habitat.

558

559

560

561

562

563

564

565

566

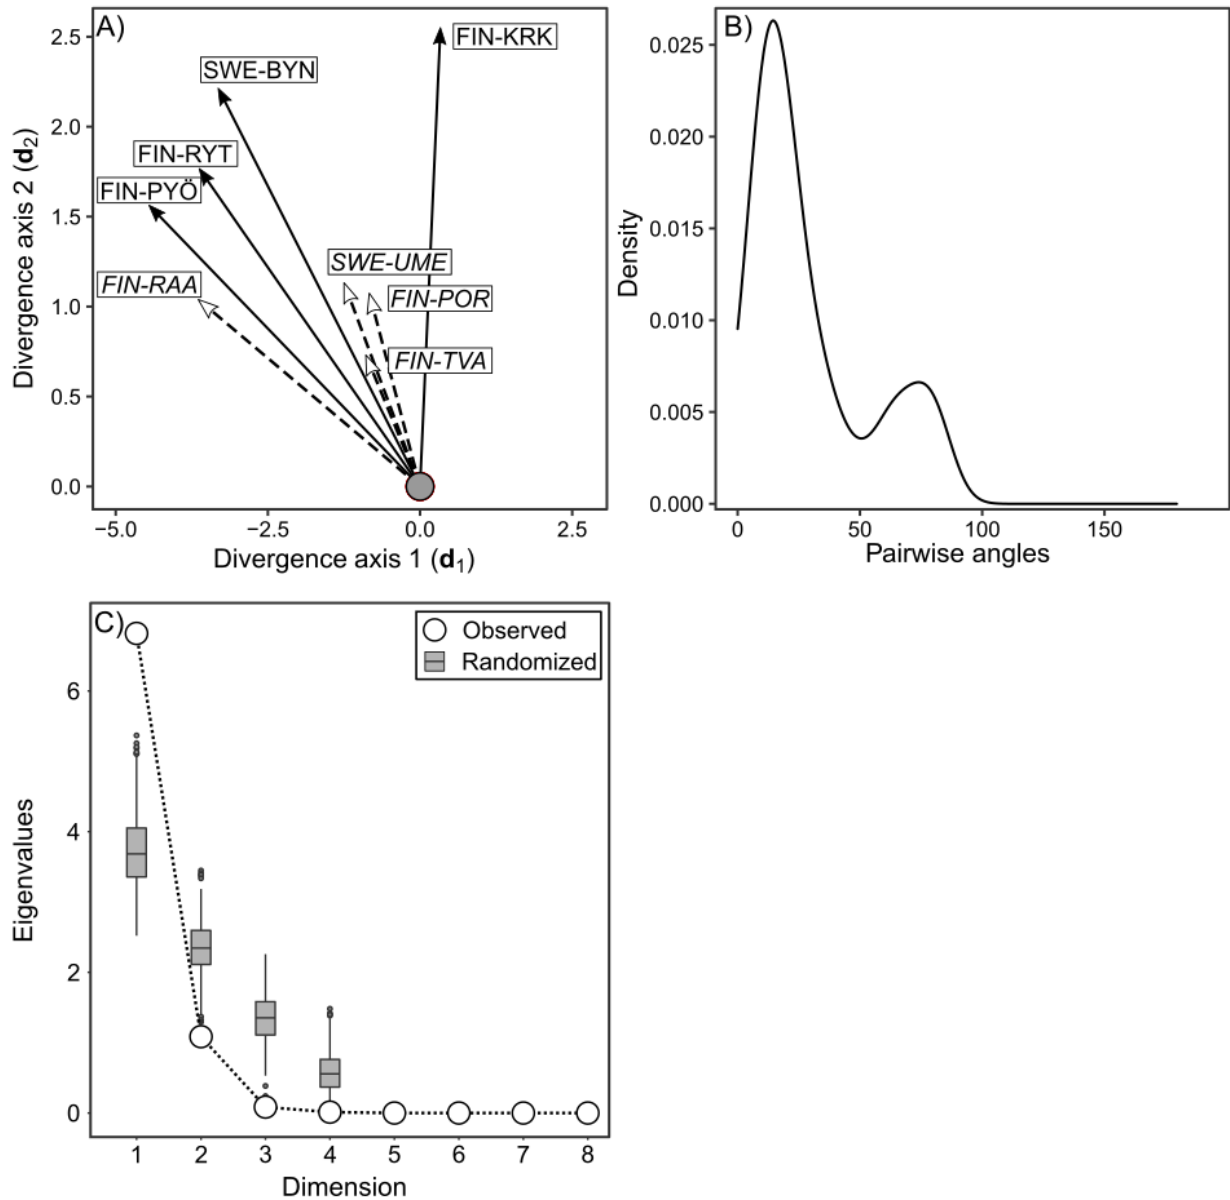

567

568

569

570

571

572

573

574

575

576

577

578

579

**Figure 2. Results of the phenotypic vector analyses.** A) Graphical representation of the phenotypic vectors. The vectors of divergence (filled solid arrows) and plasticity (open dashed arrows) from the ancestral marine population (gray filled circle) are projected in the multivariate divergence space where  $d_1$  and  $d_2$  represent the first and second main axis of the multivariate divergent covariance matrix. Population codes for pond and marine (italic) are indicated in black text. B) The distribution of observed vector angles in degree. C) Results of the multivariate test of parallelism. Eigenvalues from the decomposition of the  $C$  matrix calculated from the observed (open circles) and randomized (gray boxplots) data are shown. Boxplots represent the expected (randomized) eigenvalues calculated from sampling a Wishart distribution. Observed eigenvalues greater than expected ones indicate a single significant axis of parallelism among vectors.
